# Supplementary material
Source: HighWire-hosted journal article supplement (https://www.cmajopen.ca/highwire/filestream/84917/field_highwire_adjunct_files/1/2020-0122-2-at.pdf)
Supplement: 2020-0122-2-at.pdf [file 2020-0122-2-at.pdf]

## Appendix 2 (as supplied by the authors): List of Opioid or Opioid Containing Products

### Opioid Product

---

Acetaminophen & Caffeine & Codeine Phosphate  
Acetaminophen & Caffeine Citrate & Codeine Phosphate  
Acetaminophen & Chlorpheniramine Maleate & Codeine Phosphate & Pseudoephedrine  
Acetaminophen & Chlorzoxazone & Codeine  
Acetaminophen & Codeine & Caffeine  
Acetaminophen & Codeine & Doxylamine  
Acetaminophen & Codeine Phosphate  
Acetaminophen & Codeine Phosphate & Methocarbamol  
Acetaminophen & Methocarbamol  
Acetaminophen & Oxycodone  
Acetaminophen & Tramadol  
Acetylsalicylic Acid & Butalbital & Caffeine  
Acetylsalicylic Acid & Butalbital & Caffeine & Codeine Phosphate  
Acetylsalicylic Acid & Caffeine & Codeine Phosphate  
Acetylsalicylic Acid & Caffeine & Codeine Phosphate & Meprobamate  
Acetylsalicylic Acid & Caffeine Citrate & Codeine Phosphate  
Acetylsalicylic Acid & Caffeine Citrate & Codeine Phosphate & Meprobamate  
Acetylsalicylic Acid & Codeine Phosphate  
Acetylsalicylic Acid & Codeine Phosphate & Methocarbamol  
Acetylsalicylic Acid & Oxycodone  
Alfentanil  
Ammonium Chloride & Codeine Phosphate  
Ammonium Chloride & Codeine Phosphate & Diphenhydramine  
Ammonium Chloride & Hydrocodone Bitartrate & Phenylephrine & Pyrilamine Maleate  
Anileridine  
Atropine Sulfate & Diphenoxylate  
Belladonna & Opium  
Belladonna Extract For Oral Use & Opium Powder  
Brompheniramine Maleate & Codeine Phosphate & Guaifenesin & Phenylephrine  
Brompheniramine Maleate & Codeine Phosphate & Phenylephrine  
Brompheniramine Maleate & Guaifenesin & Hydrocodone Bitartrate & Phenylephrine  
Butorphanol Tartrate  
Chlorpheniramine Maleate & Pseudoephedrine & Hydrocodone Bitartrate  
Citric Acid Sodium & Doxylamine Succinate & Etafedrine & Hydrocodone Bitartrate  
Codeine & Guaifenesin & Pseudoephedrine & Triprolidine  
Codeine & Pseudoephedrine & Triprolidine  
Codeine  
Codeine Phosphate & Guaifenesin & Pheniramine Maleate  
Codeine Phosphate & Guaifenesin & Pseudoephedrine & Pseudoephedrine & Triprolidine  
Codeine Phosphate & Guaifenesin & Pseudoephedrine

Appendix to: Langford BJ, Chen C, Daneman N, et al. Concordance between high antibiotic prescribing and high opioid prescribing among primary care physicians: a cross-sectional study. *CMAJ Open* 2021. DOI:10.9778/cmajo.20200122. Copyright © 2021 The Author(s) or their employer(s).

To receive this resource in an accessible format, please contact us at [cmajgroup@cmaj.ca](mailto:cmajgroup@cmaj.ca).

Codeine Phosphate & Pseudoephedrine & Triprolidine  
Dextropropoxyphene  
Dextropropoxyphene Napsylate  
Dihydrocodeine Bitartrate & Doxylamine Succinate & Etafedrine & Ethanol & Sodium Citrate  
Fentanyl  
Fentanyl Citrate  
Hydrocodone & Phenyltoloxamine Citrate  
Hydrocodone Bitartrate  
Hydrocodone Bitartrate & Phenylephrine  
Hydrocodone Bitartrate & Phenyltoloxamine Chloride  
Hydromorphone  
Hydromorphone Hbr  
Hydromorphone  
Kaolin & Opium & Pectin  
Levorphanol Tartrate  
Meperidine  
Methocarbamol & Acetaminophen & Codeine  
Morphine  
Nalbuphine  
Naloxone & Oxycodone  
Normethadone & P-Hydroxyephedrine  
Opium  
Oxycodone  
Oxymorphone  
Pentazocine  
Propoxyphene  
Pseudoephedrine & Codeine Phosphate & Guaifenesin  
Remifentanil  
Sufentanil Citrate  
Tapentadol  
Tramadol
